# Supplementary material
Source: PubMed Central journal article supplement (PMC5322168)
Supplement: NIHMS839388-supplement-1.pdf [file NIHMS839388-supplement-1.pdf]

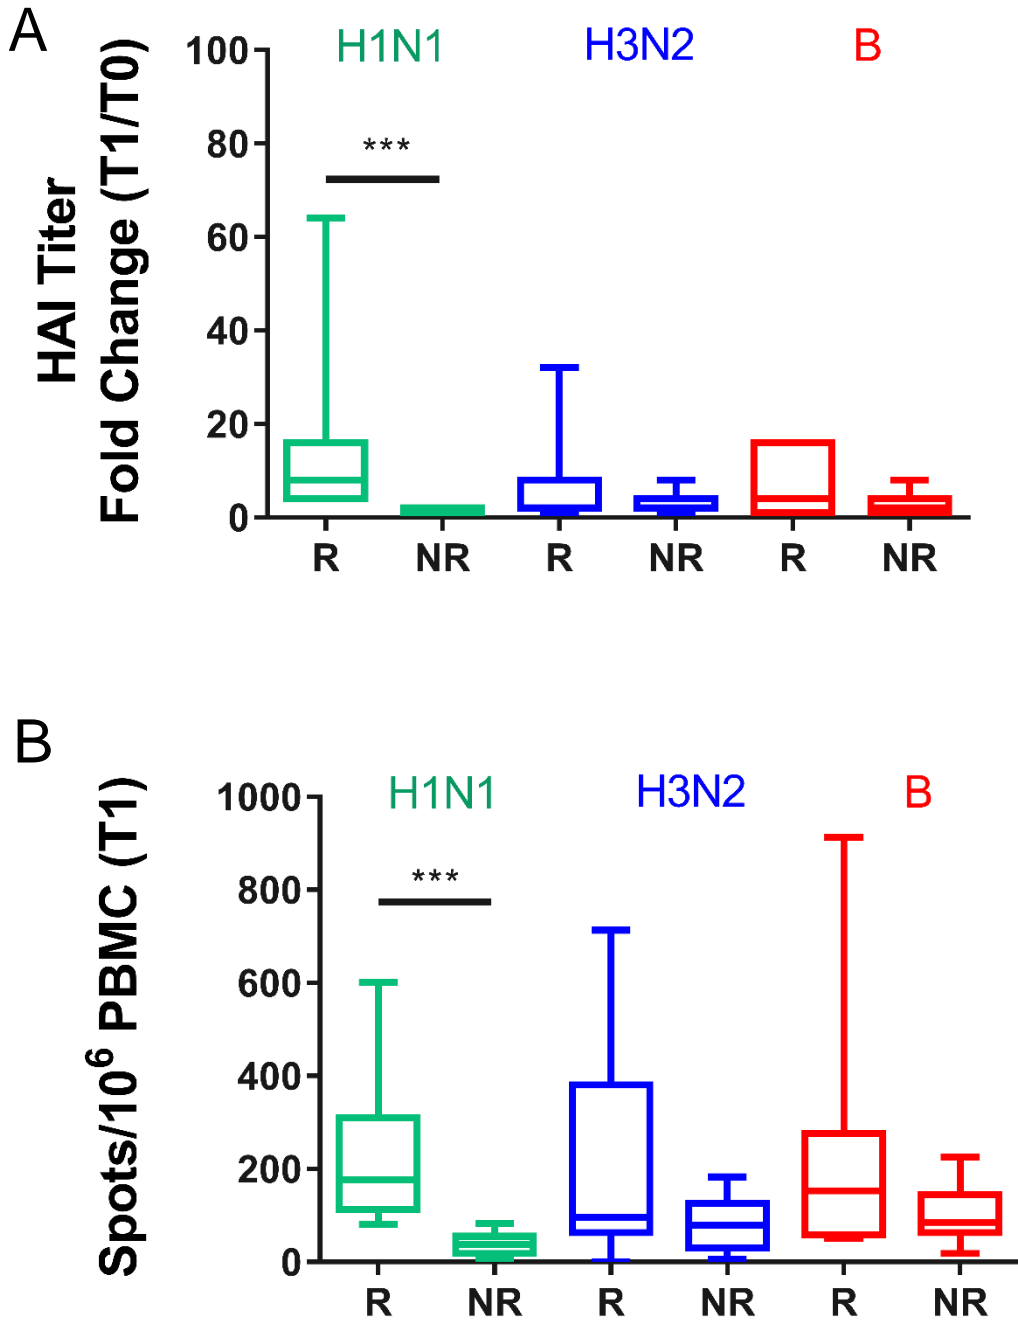

**Supplemental Figure 1.** Serological and Immunological Assessment of Response to Influenza Vaccine Strains. **A)** Serum titer fold changes, and **B)** Memory B cell ELISpot data from 5 day stimulation cultures, are shown in box and whisker plots for HIV+ responders (R) and non-responders (NR) as previously defined for response to H1N1. Statistical significance was determined by student's T test, \*\*\* denotes p value<0.001.

**Supplemental Table 1. Gene Panel for Fluidigm BioMark Experiment**

| GENE NAME | GENE FAMILY          | TAQMAN ASSAY ID | GENE NAME | GENE FAMILY               | TAQMAN ASSAY ID |
|-----------|----------------------|-----------------|-----------|---------------------------|-----------------|
| CXCR3     | Chemokine Receptors  | Hs00171041_m1   | TGIF1     | Other                     | Hs00820148_g1   |
| CXCR4     | Chemokine Receptors  | Hs00607978_s1   | CAMK4     | TCR-signaling             | Hs00174318_m1   |
| CCR2      | Chemokines           | Hs00356601_m1   | CAV1      | TCR-signaling             | Hs00971716_m1   |
| CCR6      | Chemokines           | Hs00171121_m1   | CD3D      | TCR-signaling             | Hs00174158_m1   |
| CCR7      | Chemokines           | Hs00171054_m1   | CD4       | TCR-signaling             | Hs00181217_m1   |
| IL21R     | Cytokine Receptors   | Hs00222310_m1   | DUSP4     | TCR-signaling             | Hs01027785_m1   |
| IL2RA     | Cytokine Receptors   | Hs00166229_m1   | DUSP6     | TCR-signaling             | Hs04329643_s1   |
| IL6RA     | Cytokine Receptors   | Hs00169842_m1   | FYN       | TCR-signaling             | Hs00941600_m1   |
| IL6ST     | Cytokine Receptors   | Hs00174360_m1   | MAPK3     | TCR-signaling             | Hs00533968_m1   |
| IL7R      | Cytokine Receptors   | Hs00233682_m1   | NFATC1    | TCR-signaling             | Hs00542678_m1   |
| IFNG      | Cytokines            | Hs00174143_m1   | NFKB1     | TCR-signaling             | Hs00765730_m1   |
| IL10      | Cytokines            | Hs00961622_m1   | PRKCA     | TCR-signaling             | Hs01041915_m1   |
| IL12Rb2   | Cytokines            | Hs01548202_m1   | PLCG      | TCR-signaling             | Hs01008225_m1   |
| IL1B      | Cytokines            | Hs01555410_m1   | SYK       | TCR-signaling             | Hs00374292_m1   |
| IL2       | Cytokines            | Hs00174114_m1   | ZAP70     | TCR-signaling             | Rh02837378_m1   |
| IL6       | Cytokines            | Hs00985639_m1   | BCL6      | TFH-associated            | Hs00277037_m1   |
| FOXO3     | IFN-induced          | Hs00921424_m1   | CD40L     | TFH-associated            | Hs00163934_m1   |
| IFIT2     | IFN-induced          | Hs00533665_m1   | CXCR5     | TFH-associated            | Hs00173527_m1   |
| IFNAR2    | IFN-induced          | Hs01022060_m1   | ICOS      | TFH-associated            | Hs00359999_m1   |
| MX1       | IFN-induced          | Hs00895608_m1   | ID2       | TFH-associated            | Rh02796147_m1   |
| OAS1      | IFN-induced          | Hs00973637_m1   | ID3       | TFH-associated            | Hs00171409_m1   |
| CD38      | Immune Activation    | Hs01120071_m1   | IL21      | TFH-associated            | Hs00222327_m1   |
| CD69      | Immune Activation    | Hs00934033_m1   | IRF4      | TFH-associated            | Hs01056533_m1   |
| CD74      | Immune Activation    | Hs00959498_g1   | MAF       | TFH-associated            | Hs00193519_m1   |
| PIK3C2B   | Immune Activation    | Hs00898518_m1   | PDCD1     | TFH-associated            | Hs00169472_m1   |
| SOCS1     | Immune Activation    | Hs00705164_s1   | PRDM1     | TFH-associated            | Hs00153357_m1   |
| ABCB1     | Inflammation         | Hs00184500_m1   | SELL      | TFH-associated            | Hs00174151_m1   |
| ADAM17    | Inflammation         | Hs01041915_m1   | LIGHT     | TNF Family                | Hs00998604_m1   |
| CCR5      | Inflammation         | Hs00152917_m1   | TNF       | TNF Family                | Hs00174128_m1   |
| CXCL10    | Inflammation         | Hs00171042_m1   | TNFRSF4   | TNF Family                | Hs00533968_m1   |
| CYBB      | Inflammation         | Hs00166163_m1   | TNFSF13   | TNF Family                | Hs00182565_m1   |
| FAS       | Inflammation         | Hs00531110_m1   | BATF      | Transcription Factors     | Hs00232390_m1   |
| ICAM1     | Inflammation         | Hs00164932_m1   | EOMES     | Transcription Factors     | Hs00172872_m1   |
| ITCH      | Inflammation         | Hs00395201_m1   | FOXP3     | Transcription Factors     | Hs00203958_m1   |
| NOD2      | Inflammation         | Hs01550762_g1   | GATA3     | Transcription Factors     | Hs00231122_m1   |
| PTEN      | Inflammation         | Hs02621230_s1   | RORA      | Transcription Factors     | Hs00536545_m1   |
| CTLA4     | Inhibitory Receptors | Hs00175480_m1   | RORC      | Transcription Factors     | Hs01076112_m1   |
| HAVCR2    | Inhibitory Receptors | Hs00958623_m1   | RUNX3     | Transcription Factors     | Hs00231709_m1   |
| KLRG1     | Inhibitory Receptors | Rh00929962_m1   | STAT1     | Transcription Factors     | Hs01013996_m1   |
| LAG3      | Inhibitory Receptors | Hs00158563_m1   | STAT3     | Transcription Factors     | Hs01047580_m1   |
| LILRB1    | Inhibitory Receptors | Hs01848117_s1   | STAT4     | Transcription Factors     | Rh02896026_m1   |
| PDL1      | Inhibitory Receptors | Hs00228839_m1   | STAT5A    | Transcription Factors     | Rh02844611_m1   |
| TIGIT     | Inhibitory Receptors | Hs00545087_m1   | TBX21     | Transcription Factors     | Hs00894392_m1   |
| CD2       | Other                | Hs00233515_m1   | TFAM      | Transcription Factors     | Hs00273372_s1   |
| DOCK8     | Other                | Hs00298892_m1   | APOBEC3G  | Viral restriction Factors | Hs00222415_m1   |
| MTOR      | Other                | Hs00234508_m1   | BST2      | Viral restriction Factors | Hs00171632_m1   |
| PTX3      | Other                | Hs00173615_m1   | PRF1      | Viral restriction Factors | Hs00169473_m1   |
| TGIF1     | Other                | Hs00820148_g1   | SAMHD1    | Viral restriction Factors | Hs00210019_m1   |
| CAMK4     | TCR-signaling        | Hs00174318_m1   | TRIM5     | Viral restriction Factors | Hs01552559_m1   |

**A**In vitro Stimulation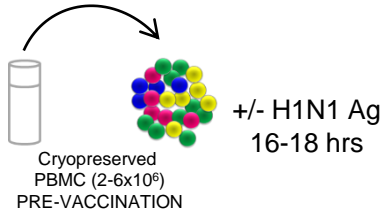FACS Sorting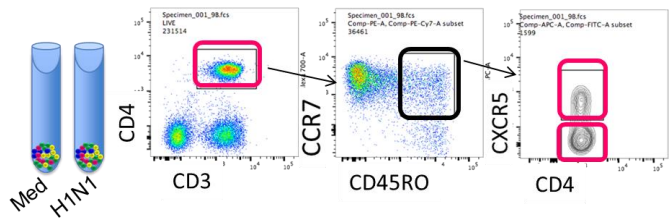Fluidigm BioMark on Cell Subsets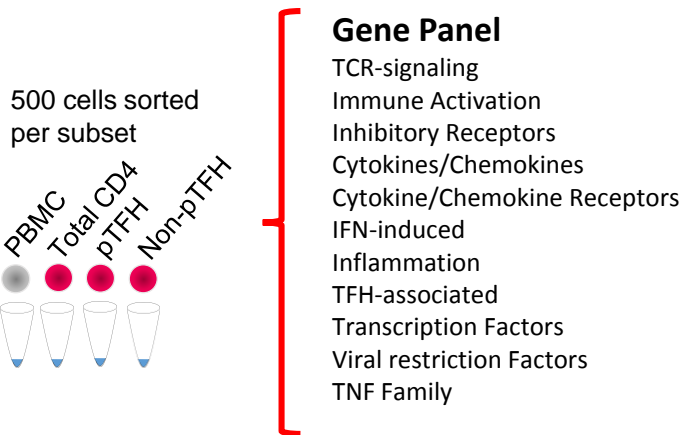**B**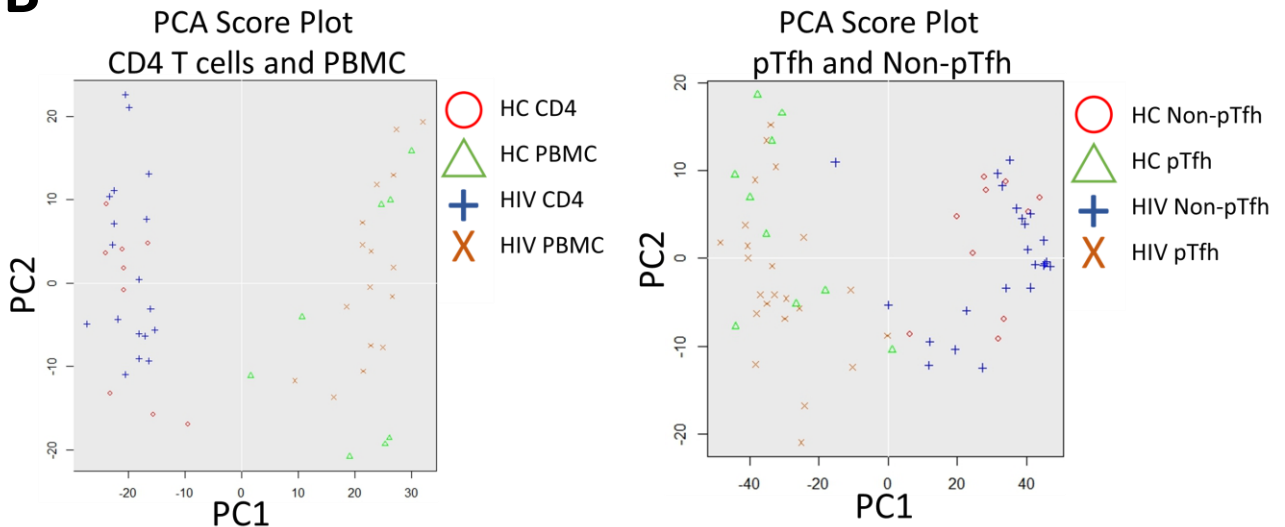

**Supplemental Figure 2.** Fluidigm BioMark Experiment. A) Experimental Design Schematic: In vitro Stimulation, FACS Sorting, and Fluidigm. Principle Component Analysis on Subsets analyzed by Fluidigm. B) PCA comparing CD4 T cells and PBMC from HIV+ and HIV-uninfected participants (left) and pTfh and non-pTfh from HIV+ and HIV-uninfected participants (right). PCA plots were generated from Fluidigm data using SingulaR package in R.

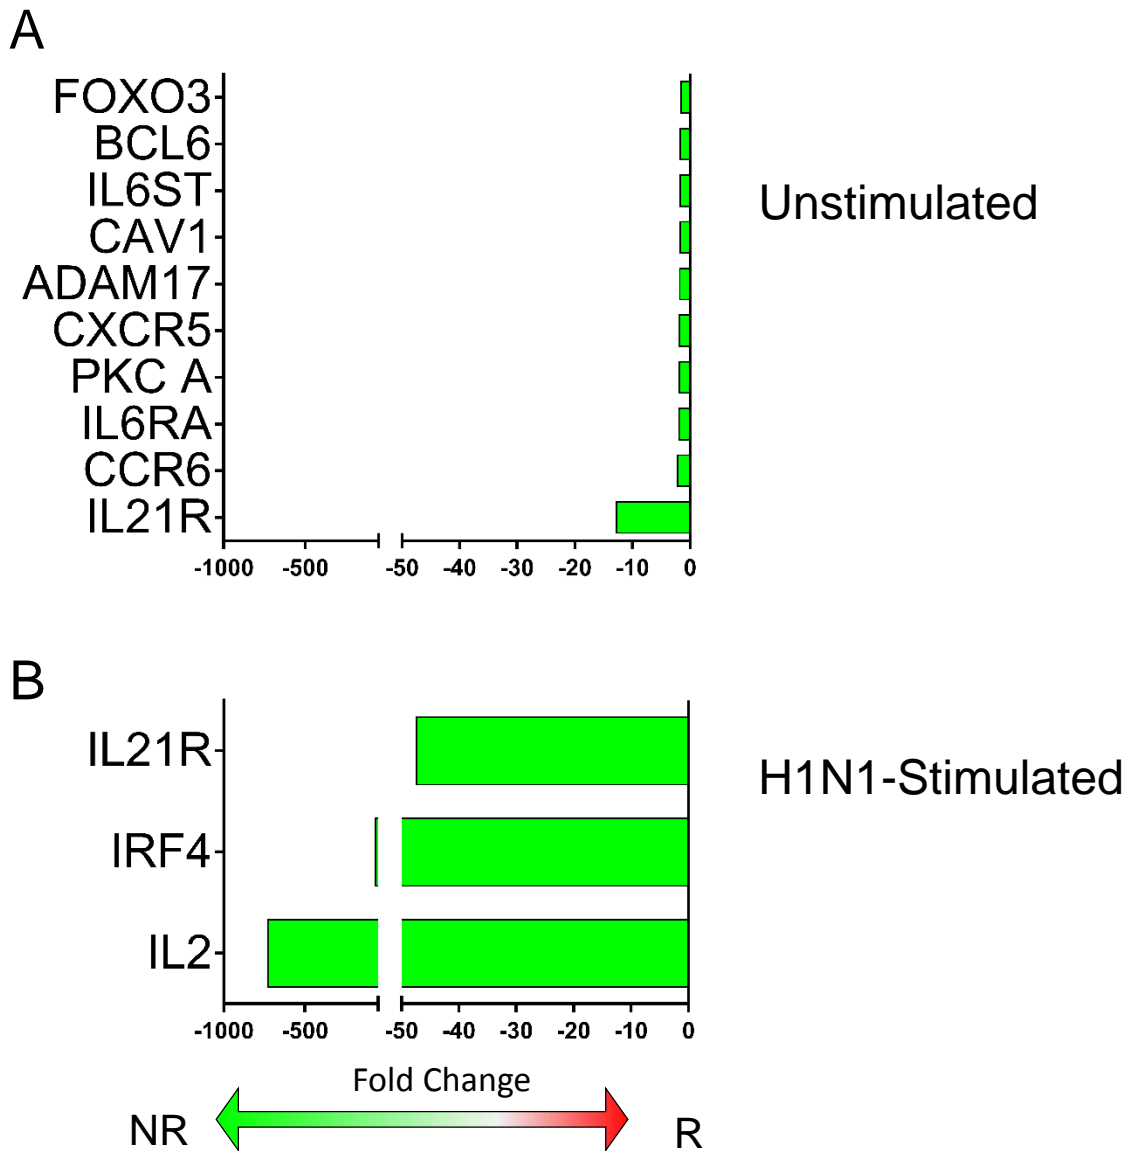

**Supplemental Figure 3.** Differential gene expression analysis in PBMC from pre-vaccination samples isolated from HIV+ Responders (R) and Non-Responders (NR) before (**A**) and after H1N1 stimulation (**B**). Bars show the fold difference in expression between R and NR groups (ANOVA,  $p$ -value  $<0.05$ , Fold Change  $>1.5$ ).
